# Supplementary material
Source: publisher site journal article supplement (https://www.kjim.org/upload/media/kjim-2020-195-suppl4.pdf)
Supplement: Supplementary file 1 [file kjim-2020-195-suppl4.pdf]

**Supplementary Table 4. Risk factors of ESKD in adult diabetic patients.**

| Variable                         | B     | HR   | 95% CI    | p value |
|----------------------------------|-------|------|-----------|---------|
| Male sex                         | 0.21  | 1.23 | 1.02–1.48 | 0.03    |
| Age, yr                          | −0.02 | 0.98 | 0.98–0.99 | < 0.001 |
| Hypertension (presence)          | 0.37  | 1.45 | 1.08–1.96 | 0.01    |
| SBP (compared to 120–129 mmHg)   |       |      |           |         |
| < 110                            | 0.13  | 1.14 | 0.75–1.72 | 0.55    |
| 110–119                          | 0.09  | 1.10 | 0.78–1.55 | 0.61    |
| 130–139                          | 0.52  | 1.68 | 1.23–2.30 | 0.001   |
| 140–149                          | 0.30  | 1.35 | 0.99–1.87 | 0.06    |
| ≥ 150                            | 0.31  | 1.36 | 1.00–1.85 | < 0.05  |
| eGFR, mL/min/1.73 m <sup>2</sup> | −0.03 | 0.97 | 0.97–0.98 | < 0.001 |
| Serum albumin, g/dL              | −0.21 | 0.81 | 0.70–0.93 | 0.004   |
| Hemoglobin, g/dL                 | −0.13 | 0.88 | 0.84–0.92 | < 0.001 |
| Pathology (compared to NDRD)     |       |      |           |         |
| NDRD/DN                          | 0.01  | 1.01 | 0.58–1.78 | 0.96    |
| Pure DN                          | 0.57  | 1.76 | 1.46–2.12 | < 0.001 |

Model adjusted with age, gender, presence of hypertension, SBP, diastolic blood pressure, serum albumin, hemoglobin, glomerular filtration rate, and urine protein-to-creatinine ratio.

ESKD, end-stage kidney disease; B, beta coefficient; HR, hazard ratio; CI, confidence interval; SBP, systolic blood pressure; eGFR, estimated glomerular filtration rate; NDRD, non-diabetic renal disease; DN, diabetic nephropathy.
